# Supplementary material for: Sunset Yellow and Allura Red modulate Bcl2 and COX2 expression levels and confer oxidative stress-mediated renal and hepatic toxicity in male rats
Source: PeerJ. 2018 Sep 28;6:e5689. doi: 10.7717/peerj.5689 (PMC6166620; doi:10.7717/peerj.5689)
Supplement: Data S2 [file peerj-06-5689-s002.xls]

## Sheet: Raw data Tail moment
	Tail Moment
			Control						Sunset yellow-treated						Allura red-treated
		Animals	Sample 1	Sample 2	Sample 3				Sample 1	Sample 2	Sample 3				Sample 1	Sample 2	Sample 3
		Num
		1	0.0104097	0.222755	0.0103998				1.75295	0.166894	1.65669				0.549118	0.130523	0.116559
		2	0.145896	0.875039	0.040154				1.12867	5.51387	1.15387				8.18773	0.415268	3.38616
		3	0.29419	0.18913	0.0598789				2.07684	1.59189	2.10734				1.24541	5.03793	1.11178
		4	0.141802	0.296544	0.0155869				1.7023	1.60026	1.52905				0.306662	0.0271668	0.436336
		5	1.98681	0.349218	0.0654007				0.220809	1.87152	1.94639				0.108503	0.0408266	0.997171
		6	0.211541	0.894876	0.424782				0.377168	1.27543	6.13399				0.767624	0.0458162	2.68296
		7	3.36761	0.4028	0.269725				0.460347	0.458626	1.20478				0.0187406	0.0160762	1.29027
		8	4.94017	0.135688	0.837423				7.12965	1.26837	2.70453				3.20893	0.761665	1.06526
		9	0.08708	0.0401322	0.207827				4.87455	0.747727	0.54974				0.733618		0.707877
		10	0.698495	0.882507	0.10654				11.3987	0.198697	9.46135				0.661732		1.69248
		11	5.27378	0.963137	0.373533				0.0733288	0.24012	0.274778				0.19596		3.7998
		12	0.268894	0.524193					0.241083	7.70641	1.26972				1.18925		2.53174
		13	0.251175	0.362919					1.56061	0.307062	0.482406				0.768498		1.58247
		14	1.72643	0.22534					0.133058	0.252636	6.70785				8.37462		0.124303
		15	0.263564	2.15571					0.0961286	0.105501	2.30662				1.2639		0.00313998
		16	0.95698	0.0280242					1.1035	0.114484	0.181093				0.98943
		17	0.0267965	0.176946					0.440574	0.0930856	3.92603				1.75162
		18	0.0128011	0.320557						4.51444	0.894546				0.0550641
		19	0.524689	1.01235						0.053679	5.4733				0.408805
		20	0.407035	0.494772						0.0574345	0.650612
		21	0.0614795	0.143654						2.54055	0.663327
		22	0.18621	0.30268						0.448202	2.49402
		23	0.0960667	3.22556						0.280282	5.01624
		24	5.47543	0.599426						0.370396	2.28681
		25		0.0770411						0.408199	1.82831
		26		1.22625							0.257585
		27									3.30541
		28
		29
		30
		31
				Mean/sample					SD/sample
				Sample 1	Sample 2	Sample 3			Sample 1	Sample 2	Sample 3
			Control	1.14231	0.620279	0.219205			1.76227	0.711095	0.25096
			Sunset yellow-treated	2.04531	1.28743	2.46172			3.05478	1.92242	2.29953
			Allura red-treated	1.62027	0.809409	1.43522			2.46049	1.7285	1.18725
							Mean	SD
						Control	0.660596	0.462869
						Sunset yellow	1.93149	0.595361
						Allura red	1.2883	0.424929
							TTEST
							Sunset yellow-treated	0.043289
							Allura red-treated	0.158628
